# Supplementary material for: Amplification of pico-scale DNA mediated by bacterial carrier DNA for small-cell-number transcription factor ChIP-seq
Source: PubMed Central journal article supplement (PMC4328043; doi:10.1186/s12864-014-1195-4), 2015-02-05
Supplement: 12864_2014_1195_MOESM1_ESM.pdf [file 12864_2014_1195_MOESM1_ESM.pdf]

Figure S1.

Normal BM (CD45-1+2 mix):

Leukemia:

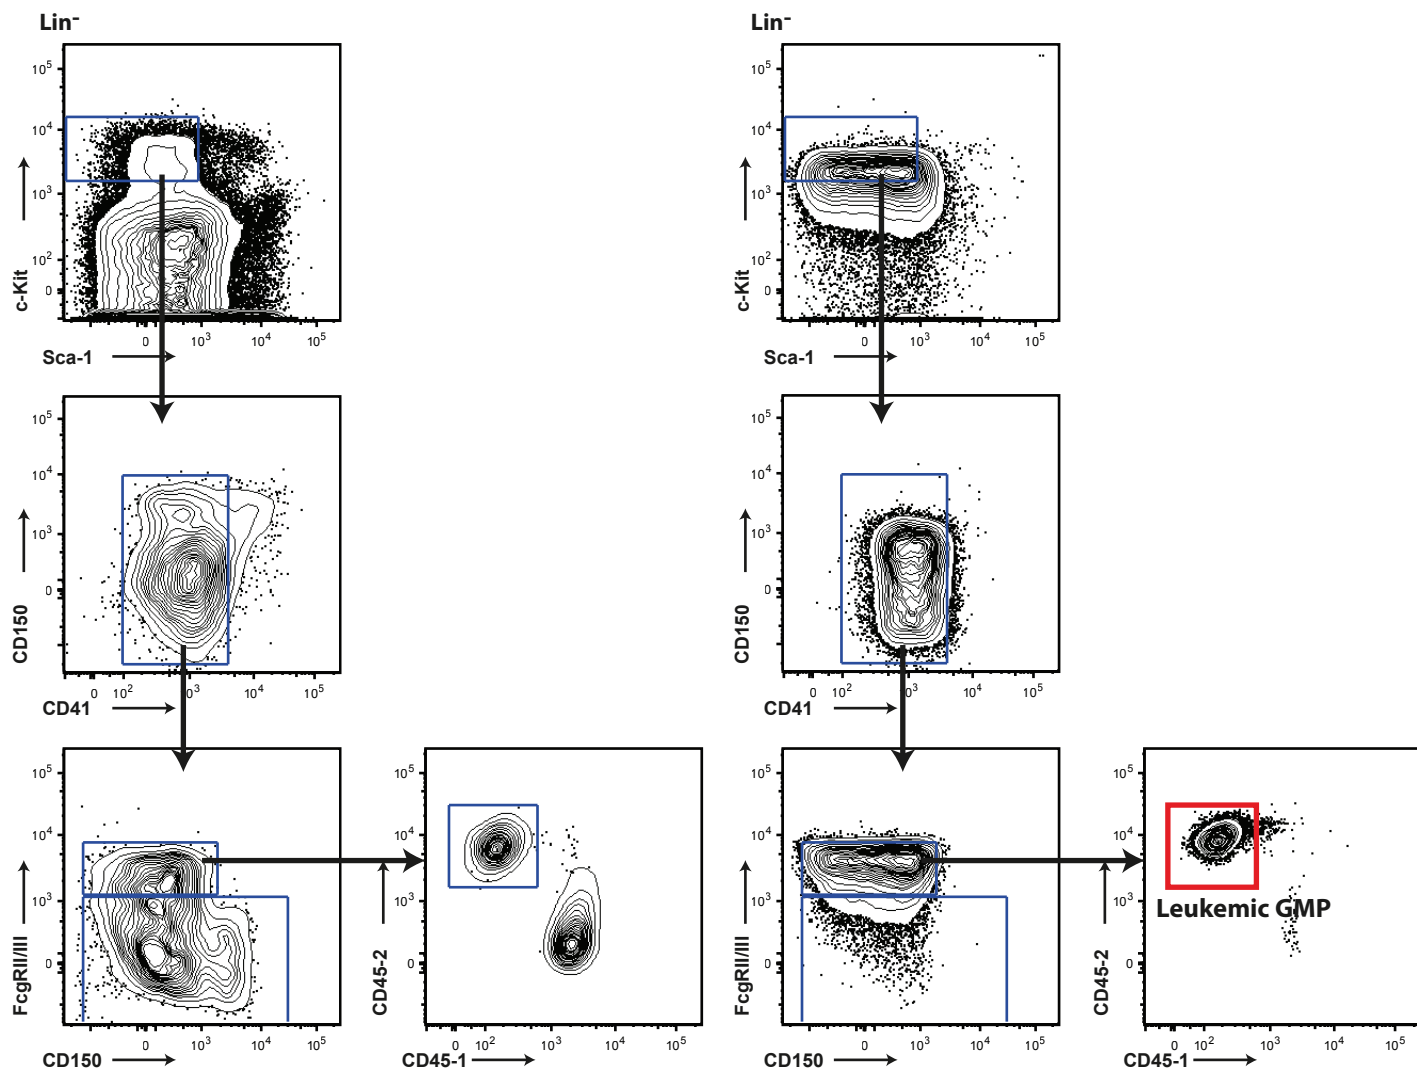

**Figure S1 Schematic representation of fluorescence activated cell sorting strategy.** Leukemic GMPs (right hand panels, red squares) were isolated using gates defined from normal BM populations (left hand panels, blue squares) as shown, and used for CHIP-seq experiments. Details on phenotypic markers used can be found in Materials and methods.
