# Supplementary material for: Amplification of pico-scale DNA mediated by bacterial carrier DNA for small-cell-number transcription factor ChIP-seq
Source: PubMed Central journal article supplement (PMC4328043; doi:10.1186/s12864-014-1195-4), 2015-02-05
Supplement: 12864_2014_1195_MOESM2_ESM.pdf [file 12864_2014_1195_MOESM2_ESM.pdf]

Figure S2.

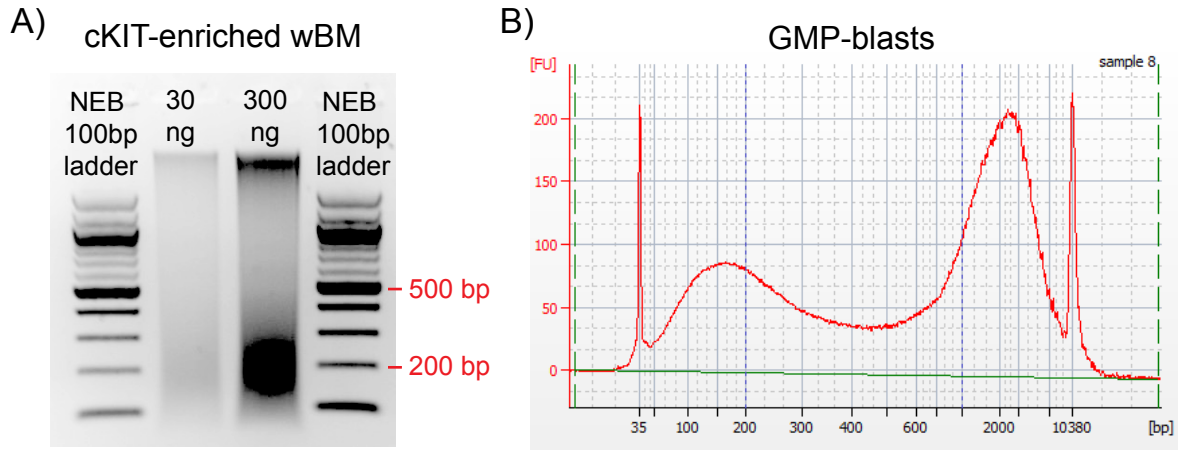

**Figure S2 Validation of sonicated input chromatin.** (A) Purified DNA from c-KIT enriched whole bone marrow (wBM) cells, prepared in parallel with FACS-isolated populations, subjected to standard agarose electrophoresis. (B) Purified DNA aliquot from isolated GMP-blast population chromatin assessed by Agilent Bioanalyzer High Sensitivity assay.
