# Supplementary material for: Amplification of pico-scale DNA mediated by bacterial carrier DNA for small-cell-number transcription factor ChIP-seq
Source: PubMed Central journal article supplement (PMC4328043; doi:10.1186/s12864-014-1195-4), 2015-02-05
Supplement: 12864_2014_1195_MOESM3_ESM.pdf [file 12864_2014_1195_MOESM3_ESM.pdf]

Figure S3.

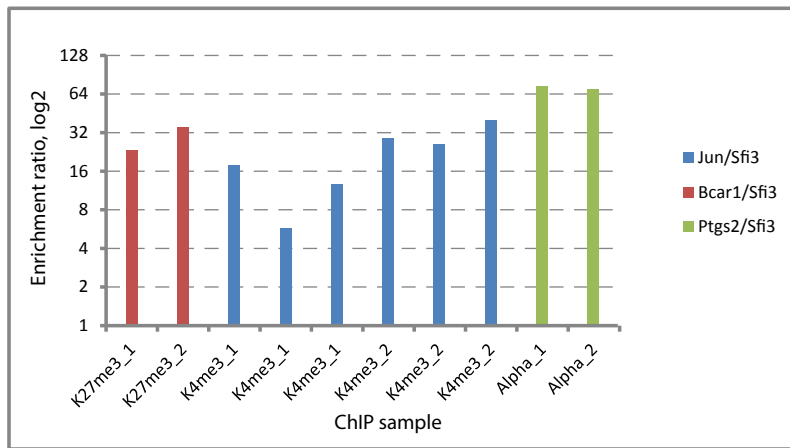

**Figure S3 Assessment of individual sample ChIP enrichment.** Ratio of enrichment as arbitrary qPCR units of Bcar1 (H3K27me3), Jun (H3K4me3) and Ptgs2 (CEPBA) amplicons over Sfi3 amplicons. A four-point dilution series used as standard for comparison. See supplemental Table 1 for primer sequences.
