# Supplementary material for: Amplification of pico-scale DNA mediated by bacterial carrier DNA for small-cell-number transcription factor ChIP-seq
Source: PubMed Central journal article supplement (PMC4328043; doi:10.1186/s12864-014-1195-4), 2015-02-05
Supplement: 12864_2014_1195_MOESM7_ESM.pdf [file 12864_2014_1195_MOESM7_ESM.pdf]

Figure S5.

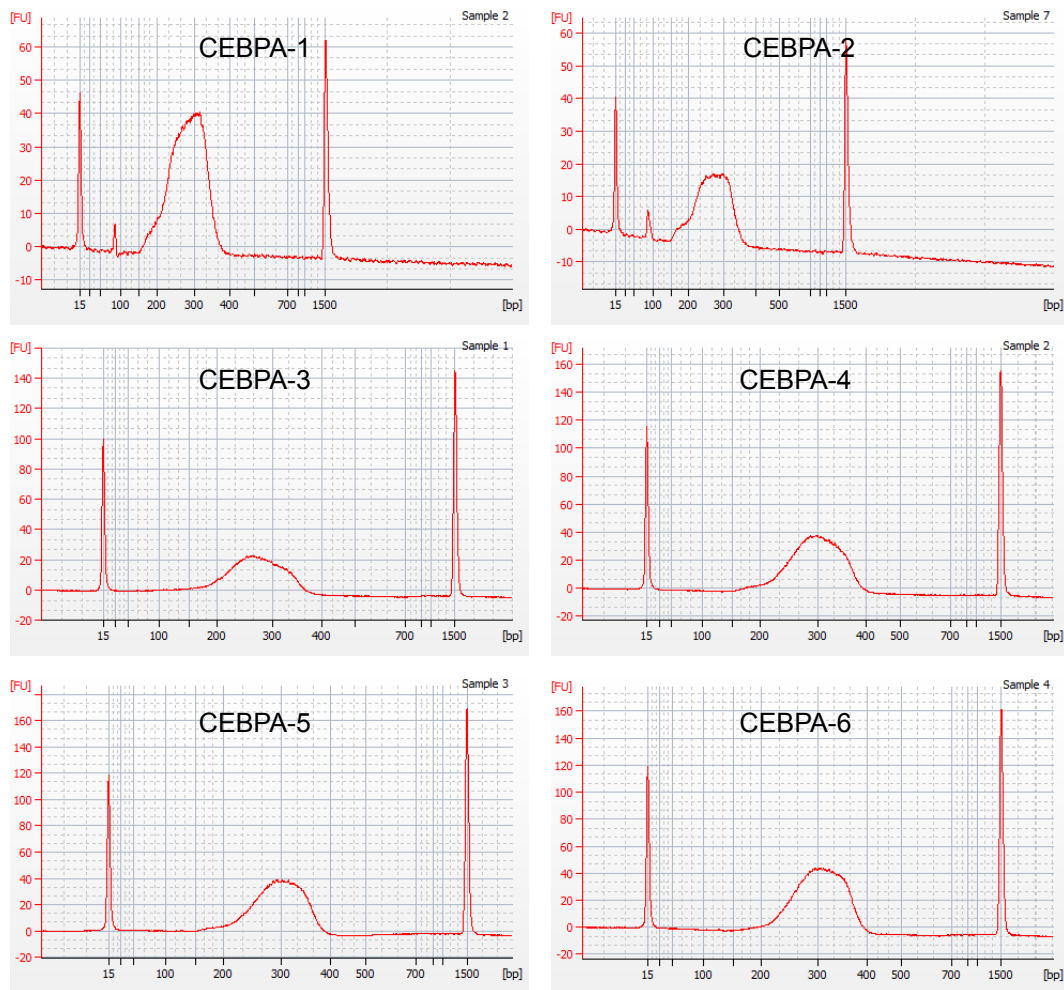

**Figure S5 Size distributions of amplified ChIP-DNA libraries.** 1/2 dilutions of CEBPA-1 and -2 libraries (two upper panels) and 1/5 dilutions of CEBPA-3 through -6 libraries (four lower panels) inspected by the Agilent Bioanalyzer DNA 1000 assay .
