# Supplementary material for: Amplification of pico-scale DNA mediated by bacterial carrier DNA for small-cell-number transcription factor ChIP-seq
Source: BMC Genomics. 2015 Feb 5;16(1):46. doi: 10.1186/s12864-014-1195-4 (PMC4328043; doi:10.1186/s12864-014-1195-4)
Supplement: Additional file 4: Figure S4. — Measuring picograms of DNA with the fluorescence Nanodrop 3300. A figure depicting fluorescent nanodrop measurement linearity and reproducibility in the 5–400 pg range. Detailed description is provided within the file. [file 12864_2014_1195_MOESM4_ESM.pdf]

Figure S4.

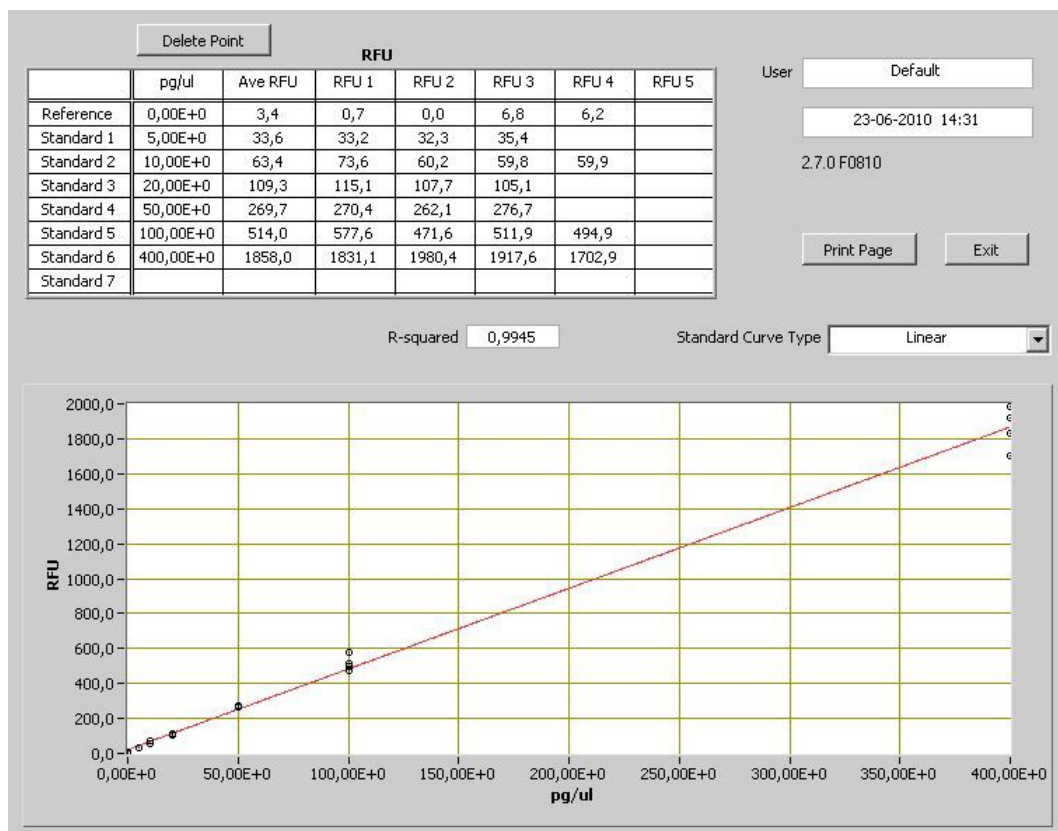

**Figure S4 Measuring picograms of DNA with the fluorescence Nanodrop 3300.** A seven point serial dilution of double-stranded, purified DNA (0, 5, 10, 20, 50, 100, 400 pg/μl) displaying very high linearity (r-squared = 0.9945) and measurement reproducibility, even down to 5 pg/μl.
